# Supplementary material for: Nanostructured Fe-N-C as Bifunctional Catalysts for Oxygen Reduction and Hydrogen Evolution
Source: MDPI journal article supplement (doi:10.3390/catal11121525), 2021-12-15
Supplement: s1 [file s1]

Archive with 1 entries (1 files):
- catalysts-1477525-supplementary.pdf
